# Supplementary material
Source: Springer Nature journal article supplement (https://www.springermedizin.de/resource/supplementary/13643_2014_313_MOESM4_ESM.pdf/9681726)
Supplement: MOESM4 [file 9681726]

P: Patients undergoing visceral surgery

I: Industry sponsorship

C: Independent funding source

O: Reported efficacy, effectiveness and safety outcomes

((((((((((("General Surgery"[Mesh] OR "general surgery"[tiab] OR "Colorectal Surgery"[Mesh] OR "colorectal surgery"[tiab] OR "Digestive System Surgical Procedures"[Mesh] OR "gastrointestinal surgery"[tiab] OR "rectum surgery"[tiab] OR "rectal surgery"[tiab] OR "visceral surgery"[tiab] OR "Liver/surgery"[Mesh] OR "liver surgery"[tiab] OR "hepatic surgery"[tiab])) OR ((pancreatic OR pancreas) AND (surgery[tiab] OR surgeries[tiab] OR surgic\*[tiab]))) OR ("Esophagus/surgery"[Mesh])) OR (esophagus AND (surgery[tiab] OR surgeries[tiab] OR surgic\*[tiab]))) OR (transplant\*[tiab] AND (surgery[tiab] OR surgeries[tiab] OR surgic\*[tiab]))) OR ("hepatobiliary-pancreatic"[tiab] AND (surgery[tiab] OR surgeries[tiab] OR surgic\*[tiab]))) OR ("Retroperitoneal Neoplasms/surgery"[Mesh] OR "Abdominal Neoplasms/surgery"[Mesh] OR "abdominal surgery"[tiab] OR "gastric surgery"[tiab] OR "bariatric surgery"[tiab] OR "bariatric surgery"[mesh] OR "splenectomy"[mesh] OR splenectomy[tiab] OR splenectomies[tiab] OR "Thyroidectomy"[Mesh] OR thyroidectomy[tiab] OR thyroidectomies[tiab] OR "Cholecystectomy"[Mesh] OR cholecystectomy[tiab] OR cholecystectomies[tiab]))OR ("hernia"[tiab] OR "inguinal"[tiab] OR "groin"[tiab] OR "hernia"[Mesh] OR "inguinal"[Mesh] OR "groin"[Mesh] AND (surgery[tiab] OR surgeries[tiab] OR surgic\*[tiab])) OR ("medical device"[tiab] OR "medical device"[Mesh] OR "stapler"[tiab] OR "stapler"[Mesh] OR "fibrin"[tiab] OR "fibrin"[Mesh] OR "sealant"[tiab] OR "sealant"[Mesh] OR "mesh"[tiab] OR "mesh"[Mesh] OR "implant"[tiab] OR "implant"[Mesh] OR "feeding tube"[tiab] OR "feeding tube"[Mesh] OR "feed\*" [tiab])) OR ("pharm\*" [tiab] OR "drug"[tiab] OR "medic\*" [tiab] OR "conserv\*" [tiab] OR "conserv\*" [Mesh] AND (surgery[tiab] OR surgeries[tiab] OR surgic\*[tiab]))OR ("nutri\*" [tiab] OR "nutri\*" [Mesh] OR "parenteral"[tiab] OR "parenteral"[Mesh] OR "enteral"[tiab] OR "enteral"[Mesh] AND (surgery[tiab] OR surgeries[tiab] OR surgic\*[tiab]))AND (randomised controlled trial[ti] OR (randomi\*[tiab] AND controlled[tiab] AND trial[tiab] AND RCT[tiab]))) NOT (letter[pt] OR newspaper article[pt] OR comment[pt])
